# Supplementary material for: A Comparison of the Tribological Properties of Two Phosphonium Ionic Liquids
Source: MDPI journal article supplement (doi:10.3390/lubricants12020053), 2024-02-14
Supplement: s1 [file s1]

## A Comparison of the Tribological Properties of Two Phosphonium Ionic Liquids

Jeng Haur Horng<sup>1</sup>, Thi Na Ta<sup>1</sup>, Raimondas Kreivaitis<sup>2</sup>, Jolanta Treinytė<sup>2</sup>, Artūras Kupčinskas<sup>2</sup>, Milda Gumbytė<sup>2\*</sup>

1. National Formosa University, Department of Power Mechanical Engineering. Yunlin 632, Taiwan, ROC; jhhorng@gmail.com; natt.mta@gmail.com
2. Vytautas Magnus University, Agriculture Academy. K. Donelaičio str. 58, 44248, Kaunas, Lithuania; raimondas.kreivaitis@vdu.lt; milda.gumbyte@vdu.lt; arturas.kupcinskas@vdu.lt; jolanta.treinyte@vdu.lt

\* Correspondence: milda.gumbyte@vdu.lt

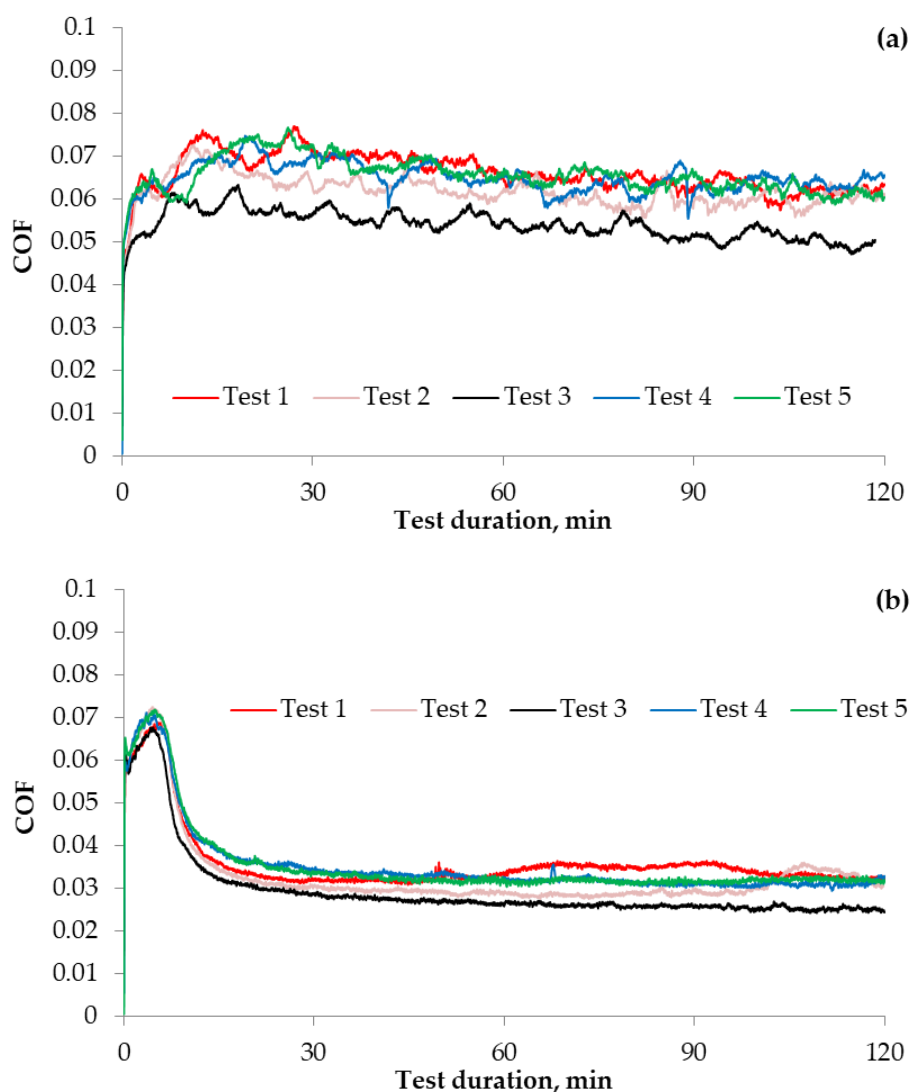

**Figure S1.** CoF variations observed during the reciprocation tests when lubricating with [P 6,6,6,14] [DCN] at the temperature of 30 °C (a) and 80 °C (b).
